# Supplementary material for: Calcitriol enhances Doxorubicin‐induced apoptosis in papillary thyroid carcinoma cells via regulating VDR/PTPN2/p‐STAT3 pathway
Source: PubMed Central journal article supplement (PMC7214146; doi:10.1111/jcmm.15224), 2020-04-13

**K1**

Control siRNA  
Calcitriol  
VDR siRNA+Calcitriol

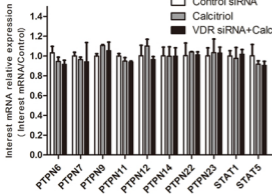**IHH4**

Control siRNA  
Calcitriol  
VDR siRNA+Calcitriol

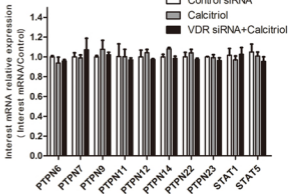

Supplement: JCMM-24-5629-s001.pdf [file JCMM-24-5629-s001.pdf]
